# Supplementary material for: Transcriptomic and the Pectinase Gene Family analysis reveals a particular pathway on malformed tomato development
Source: Research Square preprint supplement (doi:10.21203/rs.3.rs-6365605/v1), 2025-04-14
Supplement: Supplementary file 1 [file 08ce4f2178dd1fc748237c56.xlsx]

## Sheet: Sheet1
Table S7 Predicted pectinase secondary structure
Protein	Percentage
	Alpha Helix	Extended Strand	Beta Turn	Random Coil
SlPL2	21.92	24.03	5.84	48.21
SlPL4	22.2	21.08	3.36	53.36
SlPL6	25.39	20.49	2.23	51.89
SlPL7	15.58	24.62	2.26	57.54
SlPL11	22.37	22.59	2.85	52.19
SlPL12	14.96	24.44	2.49	58.1
SolycPME4	35.56	16.75	4.96	42.74
SolycPME5	38.5	17.52	4.2	39.78
SolycPME9	37.68	17.75	5.43	39.13
SolycPME12	13.73	18.63	7.84	59.8
SolycPME18	41.23	17.54	4.82	36.4
SolycPME30	31.53	19.28	5.02	44.18
SolycPME39	21.74	23.91	5.43	48.91
SolycPME40	18.42	25.73	6.14	49.71
SolycPME42	37.73	15.31	5.42	43.54
SolycPME47	38.48	16.84	4.79	39.89
SolycPME48	33.13	14.88	4.29	47.7
SolycPME78	21.35	25.73	6.14	46.78
SolycPME79	37.03	17.71	5.19	40.07
SlPG8	6.9	35.63	3.79	53.67
SlPG15	4.59	38.27	4.34	52.81
SlPG17-2	12.13	12.13	12.13	48.74
SlPG24-1	6.2	40.83	4.65	48.32
SlPG24-4	5.94	40.83	4.65	48.58
SlPG24-6	8.31	39.55	4.53	47.61
SlPG24-8	7.14	39.54	4.59	48.72
SlPG24-9	7.4	38.78	4.59	49.23
SlPG36	7.65	38.52	4.34	49.49
SlPG38-1	8.19	38.71	4.22	48.88
SlPG38-2	10.12	37.04	3.95	48.89
SlPG44	9.38	37.78	4.2	48.64
SlPG45	11.95	37.32	4.15	46.59
SlPG56-2	16.26	30.89	6.5	46.34
SlPG56-3	10.92	31.26	3.64	54.18
