# Supplementary material for: Transcriptomic and the Pectinase Gene Family analysis reveals a particular pathway on malformed tomato development
Source: Research Square preprint supplement (doi:10.21203/rs.3.rs-6365605/v1), 2025-04-14
Supplement: Supplementary file 2 [file 17344bef714ca6899b06304c.xlsx]

## Sheet: Sheet1
Table S5 Bioinformatics analysis of 34 genes information
Gene type	Gene id	Gene name	Gene sequences
Pectate lyase	Solyc02g067450.2	SlPL2	GATAAGCTTTAATATTTTCTCTGTTTAAAACAGAGTTTAAACTTAAACTTAAAAAAAAAAAATTGTGGTTGGAGGGTCCAGATCTTAATGAGCCAGTAGTTCGACCCTTCCCAAACCACCAATAAACAAAAATAAAAAAAAATAACGAACAGTCAATCTAAAATGACGAAGTCCCTCTTTATTATATTTTTTGTATTAGGTGCAATAATTCCTGCCTTCAATGCTCATATTGGAGATTTTGATGAAGTGTGGAGGAGGAGAGCCGAGGAAGCAATAAAGTTCACTCATGAAACGTATGAGAGCGAGCCTGCCAATATCACCTTAGCATTTAACCAGAAAACTCGCCAGTATGTGAATTCTCTTGCTTGCGCTTTTTCTAACATTTTTTTTGTTGATTTG…
	Solyc02g087670.2	SlPL4	AAAAAACACATCTCTTTACGTTGCTGCTTTTTTAGGCTACAACAAAGAGGGTCTCACCTCTAAACAGCCAAAGGGTTTGACCCAATTAAGACCTTCTTTCGTTTTTATTTAGAAAAAAAAAATACTTTAACTAGTTAAATTATCATAAATCTTTAAATGGGAGGAACAAAGCTGGTATATTTGTCTCTGTTACTATTTTCCACATTTTTGGTAATAAATGGTCACATTGGTGAGTTTGATGAGGTGTGGAGGAGGAGAGCCCAGGAAGCAGATGAATGGGCCATAAAGGCTTACAAGCCCGACCCCATCAATGTCACCCTTGCATTTGCTAAGGAAACTGGACAGTACGTTAAATTCACTAATTTCTCTTTTTAAAATCTTTTTGATGCCTCGCAATTA…
	Solyc03g058890.2	SlPL6	TTAAAAAAAAGGAAAAAAAATAGAGATGGGAGGTCCTAAGATAAAGTATAGCTTCCTGTTTCTATGTATCACTTTTGCTACAATAATACCAAGTCTTATGGCTCATATTGGTCACTACGACGAGGTGTGGAGGAGAAGAGCCGAAGAAGCAAAGGAGTATGCCCGTAAAATTTATGAACCACATCCTGAAAATGTCACGCTTGCATTTAACCAAAAACTTCGGGAGTAAGTTATAACTTTATTTATTCTTCATTTTTCATGTTTGTCTTTATGTATTCACGTTATGGTTTGTATTGCAGCACGATGAAGGAATTAAAGAAAGTAAAAGGTACACATAATAATAGCACAAGGAGGGGTCTAGGGACAAAAAAGTACACTGGACCATGCATGGTCACAAAT…
	Solyc03g058910.2	SlPL7	TAAGGTGATTGTATGAATGAAAATAAGCACAAAGAGGAACAAATAATGTTGCTTGTTTAGGAATAATTAATTATCCTATTTTTCTCACAACACTTTTTTAAGGGTAGTAGTGGTGTAAAGGATTGACCTTACATCAACTACCATCAACACCCCTAGCAAATTTTAACAATAACCCCAACTTACCTACCAACCTACCTACCTTATTAATTATAATAATGGAGTATTCTTATAGAACAAAAATTAATGTATTATTCATTGTACTCATTCTCTTTGTATTTGCTGCACTCGGGACAGCAATAAACGCTCCGAGGAGGAAACTAACTAAGAAATACAGAGGCCCGTGTATGGCCGTGAATTCAATTGACAAGTGCTGGAGATGTGACCCTTTCTGGGCTGAAG…
	Solyc05g007080.2	SlPL11	TAAGGTGATTGTATGAATGAAAATAAGCACAAAGAGGAACAAATAATGTTGCTTGTTTAGGAATAATTAATTATCCTATTTTTCTCACAACACTTTTTTAAGGGTAGTAGTGGTGTAAAGGATTGACCTTACATCAACTACCATCAACACCCCTAGCAAATTTTAACAATAACCCCAACTTACCTACCAACCTACCTACCTTATTAATTATAATAATGGAGTATTCTTATAGAACAAAAATTAATGTATTATTCATTGTACTCATTCTCTTTGTATTTGCTGCACTCGGGACAGCAATAAACGCTCCGAGGAGGAAACTAACTAAGAAATACAGAGGCCCGTGTATGGCCGTGAATTCAATTGACAAGTGCTGGAGATGTGACCCTTTCTGGGCTGAAG…
	Solyc05g014000.2	SlPL12	CCCTTCATTCCAAACTCCATTATTTTCTCTTCCCTTAACAACACAAAGGGGATTTCAAATGGGAATGCCACTTTCTTTTCTTCTCCTTCTTACTCTATTATCTCCTATCTTCACATTCTCCTCTCATGTTCCTGACCCTGAAGTTATAGTCCAACAAGTTAATGAGTATGACACTTTACACCCTTACTCTTATTCATCAAAATAATTTGAGCTCCATTGTATGAATCCTTACTTAGGATATTCAAAGTTTATAACAATCTCATTTTTATTCTAGTTGTCAACATATTGTAATCATGTTTTTTTATAGAGAATTAGTAAACAGATCAAGATTTTTATGTACTTACGTTATAAAGGGTACAGGCAAGGGACAGTGGGGAGGGTCGACTCCCTGACTACGTG…
Pectinesterase	Solyc01g057220.2	SolycPME4	CCATAGTCCAAACTAATTTCCATTTTTGTCTCTCTTTTCAATATCCTCTCTACACATTTAATCTTAGAAATATAAATAATGAAAGGCGGGAAGATTTTTGCATTTGGTATATCGATTATCCTGGTTGTTGGAGTAGTTATTGCAATTATTGCAAGCAATAATCGTACACAAGACTCTTCGGACAATGATGAAAAGGATGACAAAGTGCTTTCTACCACATCCAAATCCATTGCTTCTGTTTGTTCACAAACTGATTTTAAGAAATCATGTGTTAATAGCCTTAGCTCTATGGCCAACAACCAAAGCGCCACCCCAAAGGAATTCCTCCTAAAAGCCATTGAGGTGGCCATTCAGGAAGTTAGAATCGGAATAGACAGGTCCACGTATATTGGCAAAGCA…
	Solyc01g066360.2	SolycPME5	TAAAAAAATGGAAACACTAACAACCTCCTCTTTTTCTTAGACCATTTCATATCCTCACATATTTAACAGAAACCAACACTATAAATAGTTTCTCCATTTTTTAGGAAATACATCTTTCAGAGCCAAGGGGCATGTACGGTCTCTAATAAAAAATCCCCAAAAGCTCTCTATCGATTTAACTATACAAAAACATTTTTTTTTTTACTTTGGGAAAAATACATAAAAGCATCAAAATATTATGGCTAAAAAATTAGTCATTGGTGGCATAGCCTCAATTCTTGTGGTGGCTTGTGTTGTTGCAGCATGTGTCACCATTACCAAAAAGAATGCGAGCGATGGTGGTGATGGAGCTAGCAATGGTGGCATTTCAACCTCTACAAAATCTGTTCAAGCAATGTG…
	Solyc01g066420.2	SolycPME9	AATCATCAAAAGGAAATAAACACAGCCTTCAATAAAACCCCTCTGAGTTCTTCACTTACAAGAAGAACCATAGGGGTTGTTTCATAGGGAACTCCCCCCATAAAAAAAAATCCAAAAAAACAAAAAAACCAAAAAAATGACAAAGAAGGTGGTAATTGGTGGAATAGCTTCTGTTCTTGTGGTGGCTTGTGTGGTGGCAGCCTGTGTCACCCTGACTAAACATGATTCTGATACATCATCAAATGGAGTTGCAACTTCAACAAAGTCAGTTGAATCTATGTGTCAACCCACACCATACAAACAAACTTGTGAAAAGACCCTCTCCGCAGCAAAGAATGTGTCCGATCCAAAGGACTACATCAAGGTTGCATTCGAAGCCACTGTGGCAGACATCAAGAA…
	Solyc01g068120.2	SolycPME12	ATTCCGCAACACTGCTGGTCCAGAGGGTCAACAAGCTGTTGCACTTAGGATCTCTGGAGACAGGGGAGCAGTATTTGACTGCAGCATAGAGGGAAACCAAGACACCTTGTACTACCAAACATACCGTCAATTCTACCGCAACTGTGTAATATCTGGTACCGTTGATTTCATCTTCGGGTGTGGAACAGCTCTCATCCAGAACAGTGAGATCATATTGAGGAGGCCTAGACAACAAAGCAAGAACACCATCACAGCTGATGGAAAGGACCAAGCAGACAAAAACACTGGGGTAGTACTTCAGAACTGCAAAATTGTACCAGAACAATCACTTTTTGAAGATAGGTTCAAATACGAACACTACTTAATGCGCCCATGGAAGGCATATTCCACCAATGTTTA…
	Solyc01g099940.2	SolycPME18	TATCCTCCGTCAATATGCTTGTTTCCCTCTAAGCTTCTTATCCAGAACAGAACAATGTTTGGGGGAAAGCTATAACTTGTCTTTAGTCTCATTCGTTCTTTTTTCAGCCATTTTGAGGAGAGGGTCAAGAGCAATCCTCCAGGCCCTTCTCCGTTACAATTTGGTGAATTGCACGTGAAGCAGTAATATTTCTAATTATTTGTTTTACAATATCAAATACATTTTAAGAGTAGAGATCAAGCAATGGCGGGAAATAATCGTAAGAGGAATTTCACCATTATTGGTGTGTGTTCATTAATCTTGGTGGCTATGGTAGTTGCAGTAGTCGTAACGATGAATTGGAATGATAAAGAAGCTGAGGCTCAAGATGTTACGAGTACGAAAAAAGCTATTGAATCC…
	Solyc03g078090.2	SolycPME30	ACAAACTAAATTACATCAATGGCATTTGGTAATTTCTCTCTGTTAATCCTCTTTTTATTATTCTCGCTCTCTTATGCCATTGATGATCACCACCACCATTTACCGCCTGAAATTCGAGAAGCTTGTAAAGTCTCACATGATCCATCAAAATGCGAGGCTTCTTTCCATTATCATTTTCCTTCAAAATTCTCAACCCTTCAAATAATCTATTCAGCACTAGCTCGCTCTATGCATAAACTCACCAAGGCCCAGGCCTTGGTCAAGGATATACAAAAATCTGCCGCTGGAAACGTGAATGTTACCATTGCCACAGTAAATTGTGCGGAGGGACTCGCGTTTTCAGAATACAGATTTAAGCAAACGGCTAATGATGCATTGGCAAGAGGTGAAATTAAGGAC…
	Solyc05g052110.2	SolycPME39	TTACGCAATCAAACACTCATTAAAATATGAGTAGTTACCTCAATTTTCTTTTGTTAAAATTTATAAAAAAAAATTAAACCAAAAATATTTCCCATTCAAGAAACTAAGAAACTAAAAAATCCAAAAGAAAATATTAAAAATGGCTGGAAAAAATACCATATTTGTTGTGGAAACAATTATCATAACATTTCTTTTATTAAATATTATTGAAGTATTTTCTGATGATTTAGTTCCAATTCCAGCTGATAAATCACAATTAAATAGTTGGTTTGAAGCTAATGTTAAGCCATTAGATGCAAGAAAAGACACTTTAGACCCTGCCCTTGTAGCTGCTGAGGCTAATAAAACTATCATTAAGGTCATTCTTTACATTCATAATTATAACTATGTTGAAGCGTG…
	Solyc05g052120.2	SolycPME40	ATGTCTGGAAAAAAATCAATTTTGGCTTGGGAAACTATTTTTTTAATAATTCTTCTTTTTATTCCTAGAGTTTTTTCTGATGATTTAGTTCCAATTCCAGCGTGATAAATCACAATTAAATAGTGGGTTTGAAGCTAATGTTAAACCATTAGATGCAAGAAAAGACACTTTAGACCCTGCCCTTGTAGCTGCTGAGGCTAATAAAACTATCATTAAGGTTAGCTATTTTCGTAATTTTCACTCCAGATTATTTATAAAAATTCAAAAATAACTTCAATTTATATTCATGTTGAAACATTTAATTATAATTTTCAAATACCATTTCGATGTTTTTTTCAAATCTCACAATTTTTATGTTCAAAAAAAGTATTTACTTTCATAAACATATTTCATACTTCC…
	Solyc05g054360.2	SolycPME42	TTTCAAGCAAAAGGGGGAGCAATTTGCCTCTTACATAATTATTTAACCCCATATTTATATTTTTTATTTAAATTAATTATGGGGGTTAACAAGGTTGCAATTGGTAGCATTGCTTCACTTCTTCTAGTGGCTTGTGTGGTTGCAGCAGCCATTTCAACTACCAGCAAGAGGAATGAAGATAATTCATCTAATAATAACAATGATTCTCAAATTTCAACTTCTGCAAAGTCTGTTAATGTTATTTGTCAACAAACTGATTATAAAGAAACATGTGTAAAAAGTCTTGCTAAGGCTAACAACACTAATGATCCAAAAGACCTACTTAAGGTTGCGTTTGGCGCCACGATTAACGATCTCTTTGACGTTATAAAAAATTCCGCCTTGTTGATCAACGAGGCC…
	Solyc06g084620.1	SolycPME47	ATGGTGGGGAAAATCGTGGTTTCTTTGGTATCATTGTTTCTTGTGGTGGGTGTTGTATTGGGAGTGGCGATCGTTGTGCACAAAGGGTCAAAAGATCATGCAGGACAAAATCCTAAAGTCCAAATGAAGGCATCGATTGTGGAGTTCTGTAAACCTGCAGAATTCGAAATAGCTTGTTTTAAGAGCCTTGATGCAGTGTCTAAGAACGATAGTGCTACGATGAAAGACTACCTGTTGGCTTCGTTGCAAGTGACAGGGGATGAAATAAAGAAATCTTTAGCGGTTGTGGAGAAGGGTAATCCTATTGATAATAAAACGGATCCGTACAATCACATGGCAGTAGAGGATTGCAAAGAGCTGTTGCAATATGCTGTGGAGGAACTCCACGACTCCTACTCT…
	Solyc07g017560.2	SolycPME48	GTCAAATTTACACACTCAAGTAACTCTGACCAATTTGTCAAGTTCCACTAAATAAGAGGGAATAAACAGAGAAATAAATAAAACAAAAAAAAAAGAACAAATAAATAAACTAAGCACCAAATAAAGCATCATCTTGGTGTAACATCTCTGCCTTGGTTTGGGATCCAGGGCAGAGATCTTTTTAATCTCTGTCTCTATTCCGGACTCGAATCCAAAATGGCGTTTCAAGATTTTGATCAAATTTCAGAGCGGAGGAAGCTCGAGAGACAGCAAAAGATGAAGAAGAGGATAATGATTGGTGTTGTATTGCTACTCCTCATTCTCATTGCTGTTGCTGCTTCTGTTGTCTATTTTGTTGTGTTTAAAAACAAGAGCGGTGATTCCTCCTCCGCTAGTAAA…
	Solyc12g099230.1	SolycPME78	ATGAATATCAATATTACATTATTTTTTGTCATTTTCCTAGTTAATTATGTAATATTCTTGGATTTTGTTCATGGTTTATCTGTGAAAAATGTGATTGATTCTCATGTATTAACACAAAAAATTAGCACTAATCGTACAATTATAGTGGATATTAATGGACAAGGGGATTTTAAGTCTATTCAAGCAGCAATTAATTCAGTTCCAAATGGGAATTCCAATTGGGTCATTATCCATGTTAGAAAAGGGACATACAGGTACTTGATTGGTTAATTTTTTCGATTCGATTCGATCTTAGAAAAATAATCATTGTCCTGAAATTTTAAAGTATCGTCGAATTTAACTTAGGTCATTGAATTTGATGAAACTCCTGAATAATGGCTAGTTTTTTTATTACAGACT…
	Solyc12g099410.1	SolycPME79	ATGGCGGAGGCCGGTAAAAAGAAAATAGTAATTGCTGGAATTGCTTCAATTCTTCTAGTTGCTTGTGTTGTTGGTGCTGCCGTTACGTTTACAAAAAAAAATGATGATTCGACATCTAATGGGGGTGAAATTTCGAGCTCTACCAAATCAGTACAAGCCATGTGTCAACCTACTCAATATAAAGAAACATGTGCAAAATCACTTGGATCAGCTAAAAATACAACCAATCCAAAAGAGTTGATTAAAGCCGCATTTGACAATACTTTGACCGAAATTACAAATTCAATTAAAAATTCAGCTCCATTTAAAGAAGCTGCAAATGATCCAAGGACTAAGAATGCTTTAAAAGTTTGTGATGAAGTTCTTGACCGTTCGATCGAAGAGATCAAGAGATCATTT…
Exopolygalacturonase	Solyc07g015870.2	SlPG8	GAGTACATCTTTAAATCTTTCTCTCATTAAATCAAAATGTCGAGGTTTAGTACAGATCTCATGAATTTAGTTATTTTGTTGGTTTTAGTAATCTATTATAGTTTGGAGAATGCAACATGTAATGCTAGGTCACAAGAGTCAAGTATTGAGAATTTTTATGTCTTTAATGTCTTAGATTATGGTGCTAAAGGTGATGGAATCACATATGACACCAAAGTAAGATATCATACTCTATAATATTCCCTTTTGTTTTCTAATTTTAACTTTTTTTATTTTTGACAAATAAAAAAAATACAATGTTTCTTTATATCTATTATACATTCAATATATTTAGATACATAATGTTTACAAAAAAGATAGAACCTCTTTAATGAGTAAATTGATTTTGGAATCCTATCA…
	Solyc04g015530.1	SlPG15	ATGGAGAAATTCAATGAAGAAGAAGATCAAGCTAAGGTTACAACAATTAATGTGGATAGCTTTGGAGCTAAAGGTGATGGAAGTATAGATGATACAAATGTAAGTATTAGTTTTCTTTTAAAAAAAAATTCTCTTTCGAACTATTATTAAAAACACGTGAATTTCTTATGAAAATTTCTCAGACAAATCATCGTATATTGACTTGTTAAAAGCTTTTCAGACAGACACGCTTCCATTCAAAAAAAATAATTAAAATTCACATGTTTTTAATAGTGAAACAATATATGTATACTACCTTGATTTGATTTAATTTATTTGGCGATATTTGATTTAAGTTAAAATTAAAAATAAATGAAGATTTTAAAACTTATGATGTTAATTAGATGTCCTATAATTTTT…
	Solyc06g068040.2	SlPG17-2	TTAATTAACAGAATTAGACGGGGGAGCTGATCGATCATGAGATTTTATAATGTTTCTATTTTTGCATCACTACTATATAATACTATATTTTCCTTCTTGCTTTTTGTAAATGTGAACAGTTTTGATTCCTTCATTCAGTTTCCCACATTGGAAGATTCAAGAGGCAAATCAGTATCCCTTCTTTACGTGAATGAATTTGGAGCCAAAGGAGATGGCATCACCGATGACACTAAGGTAATTCCTTTTACTCGGGTCAAATCATTAATATTTGCGCTTACATAATAATATGTCAGATCAAAGGATGGACGCTCTTAGGGATAAATACAAAAAATAAAATTAAAAAAATTAACATGATATGTGTATCTAAGAGAATTTGATATTTTGATTAGAGTAAGAGTA…
	Solyc12g096740.1	SlPG24-1	ATGAGTCCCTTAGCAATTTTCTTCTTCTTTTTCTTCAACTTATCATTAGCAAAAAACACCATTTACAATGTCCAAAATTATGGAGCAAAATCCAATGGAAAAATAGATTCATCAAAAGCATTTTTAAGTGCATGGGGATCAGCATGTGCTTCTACGAGCGCGTCCACTATTTATGTGCCACGTGGAATTTACTTGATTCGTAAAATATATTTCAATGGTCAAACATGCAAAAGTAACGCTATTACTATACGTATCGATGGAACTCTCTTAGCTCCTTCTGATTATAATGTGATTGGCAATGATGGAAATTGGATAACATTTGAAAATGTCAATGGAGTTTCTATCTATGGTGGAATCTTTGATGGTCAAGGTGCTAGTCTTTGGACTTGCAAAAAATCC…
	Solyc12g096750.1	SlPG24-4	ATGAGTCCCTTAGCAATTTTCTTCTTCTTTTTCTTCAACTTATCATTAGCAACAAACACCATTTACAATGTTCAAAATTTTGGAGCACAATCCAATGGCAAAATAGATTCAACAAAAGCATTTTTAAGTGCATGGGGTTCTGCATGTGCTTCTACGAGCGCCTCCACTATTTATGTGCCACGTGGAAATTACTTGATTCGTAACATATATTTCAATGGTCAAACATGCAAAAGTAACGCTATTGCTATACATATCGATGGAACTCTCTTAGCTCCTTCTGATTATAATGCAATTGACAATGATGGAAGTTGGATAAAATTTGAAAAAGTCAATAGAGTTTCTATCTATGGTGGAATTTTTGATGGTCAAGGTGCTAGTCTTTGGGCTTGCAAAAACTCT…
	Solyc12g019180.1	SlPG24-6	ATGAGTTACATTATTCTTTTCCCACTTATTCTCACAAACATAATCATCTTTTTATTATTCAATTCATCTTCAGCTGCAAATTCCATGTACAATGTCCAAACTTATGGAGCCAACTCCGATGGAAAATCGGATTCATCCAACGCGTTCGTTAGTGCATGGACTGCAGCGTGTGCATCTACTAGCGCGGCCACTATTTACGTCCCAAAGGGAAGTTATCTATTGAACAATGTATATTTCTTTGGCCAATCGTGCAAGAGTAATGACATAACGATACATATTGAAGGCACACTTATAGCTCCTTCTGATTATAACGTTATTGGTAAATCTGGTAACTGGATTAAATTTGAACGAGTCAATGGAGTTTCCATCGTTGGTGGAACACTAGATGGACAAGGTACG…
	Solyc02g067630.2	SlPG24-8	ATGAGTCCCTTTGCTATTTTCTTCCTCTTGTTAATTAACTCATCATTAGCAGCAAATACAAATATTTACAATGTCCAAAATTATGGAGCAAAATCCGATGGAAAAACTGATTCATCAAAAGCCTTTTTGAATGCATGGGCAGCAGCCTGTGCTTCTAATAAACCTTCCACTATTAATGTGCCAATTGGAAAATACTTAATTCACAATGCAAACTTCAATGGACAAACATGCAAGAGCAAAGCTATTACCATGCACATTGATGGGACTCTCTTAGCTCCATCTGATTATAATGTGATTGGCAATGAAGAAAATTGGATAAAATTTGAAAAAGTCAATGGCCTTTCCATCTATGGTGGTACCTTTGATGGTCAAGCTGCTGCTCTTTGGGCTTGCAAGAAC…
	Solyc02g067640.2	SlPG24-9	ATGAGTCCCTTAGCAATTTTCTTCCTCTTTTTAATCAACTCATCATTAGCAGCAAATACCAATATTTACGATGTCCAAAATTATGGAGCAAAATCCGATGGAAAAACTGATTCATCAAAAGCCTTTTTGAATGCATGGGCAGCAGCCTGTGCTTCTAATACCCCTTCCACTATTAATGTACCAGCTGGAAAATACTTAATTCACAATGCAAACTTCAATGGACAAACATGCAAGAGCAAAGCTATTACCATGCACATTGATGGGACTCTCTTAGCTCCATCTGATTATAATGTGATTGGCAATGAAGAAAATTGGATAAAATTTGAAAAAGTCAATGCCCTTTCCATCTATAGTGGTACCTTTGATGGTCAAGGTGCTTCTCTTTGGGCTTGCAAGAAC…
	Solyc10g047570.1	SlPG36	ATGACTTCAAAGTGTTGTTTCACAATAGGCGTTATATTAGGCCTTGTTTTTGTATGCACAAATGCTCAAGAAAAGGTCTTCAATGTCCTTTCTTATGGTGCTAAAGCAGATGGAATGACGGACGATAGTGAGGTGAGAACCAAAAAATTAACTTTTTAATGTGTTCTTAGCTATTATTCAATTCATACGAGTAAAAAAAAAAACTAAAAGATCTACGTAATAATTTCACTTACAAACTTGTTCTATTTCTTTTAGGGATGACAATGAGACGGGACAATTTAAACCTCTGTGGGGCGGGGCGGAGTAGATTTTGAGCTAGGGGGGGAGGGGGGTTGATTTTCTAAAATAAGCTTTTTTGGGGGGTGGGGGCAGGTGCGATCGACTCTTTTGCTACTTTAA…
	Solyc00g030510.2	SlPG38-1	AAAAATGGATATGAAAATCAAGTTTGTTTATTTTGGATTGGGTGTGTTATTTCTAGCACATTTTGGAGAATCTCAAAATGCAACTTTTGATATAACCAAATATGGTGCCACAGCCAATGCTGATATTAGTGAGGTAAGTCATGCATTTTTTTTTCCTCTCATTATTTTGTTGATTTCAACCTACTTTCATCAAAAAAAAAAAATCACTTTGTTTTTAAACGATGAATAAAATAAGTAAGTTATTACCATCGAAGGATGTGGTCATGTGGCCTAGCTACATTCAGTTGAATCTCATTCGCTTGAAAAGTATAATGCATGAATTAAGACAAAAATGATTATGAATCGTTGAATGTGAGTTACATATATAAAGACAAAATTGTCTTTAGGACATAGATTCAA…
	Solyc07g044870.2	SlPG38-2	ATGGAATTAAATATCAAGATATTATTTGTATTTACATTAATGTTATTTTTAGCACGACTTGGAGTGGCTCAGGCACCAGCAGCACCAACAGGTCAGCCAGGAGTGTTTGATGTTACCAAATTTGGTGCAACACCTAATGGAGATATTAGTAAGGTACGATAAATCGTGACAGTATATTTAAAAAAAAAAGAAAAGAAAAATGTGTTTATATATTTAGAAACAATTTAAAGTGAGATGATTCAGAATAGATATATGACATCTTATAGCCACATGTTTAAAAGTTATTTTCCCCTTAAATTTTATGATTGAAAATAAAAGAGGATATATTTGTATTGATAATTTTTTTTTCCATATGATCTGCTTACATTTTACTGAGTATATTATTATTGTGGCGTTTGA…
	Solyc01g066070.2	SlPG44	AAAGAGAGGGAGAGCTCTTATACCCTCAATAAAATCCTGGGTAAGAGCTATAAAATTCATTAAAATTGTAACATATCTCAAACTCTCTTTGGTTAAAAGCAAAAATAATAAATAAAAAAAGGTTAATTGTTGCAAAAAAAAAAAAATAGCCATGACAATTATTAATGGATCATCTTTAGCCCTCATTCTTGTTTTGTCAACTTTGGTTACCTGCAAATGCAATGCAGCTGGGGTTCCTTTAGCTGATCAAACCATTTTTAATGTCATGGATTTTGATGCCAAACCTAACTCAGAACTTATGAGCACACAGGTAATTCTTCAAATATTAACTACATATGAAAGCGAAATCTAAATGAAATTTTTGGGCTGATAAATATATTTAAAATTCTATAACGGATG…
	Solyc06g009200.2	SlPG45	CCCTTTCCTTCTTTAATTTCTCACTTTTTTTCTTCTTTATTTTTATTTTTTTCAATTTCCTATTTAGGCCACAACCACAATGGCTATTCCAAAAGGATTAGAAATCAATAATATTGTAGGATTATTCTTACTTTTGGGTATAGCCATTTTATCATCAAAAGTTGCAGAATGTGCACCTTTTGGTTCGCGTCGTGGCCTTATGGAGACAGTTTTCGATGTTACCAAGCACGGAGCTAGACCAGATCCCACTGCAGATAGCACTCGGGTAAAACCCAAACTTATATTTAAATTTCTAGCTCTGCGCACTCTGCCGTAAAGCCAAAAATAAATTGGAGGCCTAACTTTTTTCTTTTTTGTTGTTGGTTTTAATAGGGATTTATGATGGCATGGAGAGCAGCA…
	Solyc03g007940.2	SlPG56-2	TTGGAATAAGATTAATATACTTACCAATATGAAAATCTCTTAAAATGGTTAGTTATTAAATGTTTAGTTTGACGCACAATCTACACTACACTATATAACAGAATCATACAACCAATATTCATTCATTCGAAAGCTTTTTGTTCATCAATGGAGTTGTACCACCAATCAACATGCCATGTAAATATATTTCTCTTTATTTAGGCAATATACATTATGCATAGATCTTCTCAATGTCCATTAATTATATAATTTACCATTTTCATTGATTCTTATGGATTTTTCTTTATTTTTTGGAACAGTTTCTAGGGAAACTGATTATCGCTTTGACATGGGGAATACTTTGTCTTAGAGCAGCGGACTGTATTGAGTATGAAGCTTTAAGTTGTCGAAAACACACAG…
	Solyc03g007950.2	SlPG56-3	GAACTCCATTAAATTATAGAATTTTACAACACATACAAATTTGCATGTGGTAAATTCAATTTCTCTTTACTTCTAAATAGCAAAGTTTTCGCCATAATAATTGGAATAAGATTAAATATACATACTTACAAATGTGAAAACCTCCTCAAATGGTTAGTTATTTTAGTTTGACGCACAATCTACACTACACTTATATAACAGAATCAAATAACCAATATTTATTCATTCGAAAGCTTTTTGTTCATCAATGGAGTTGTATCACAAATCAACATGTCATGTAAATTTATTTCTCTTAATTAGGCAACATACATTATGCATAGATCTTTTCAATGTCCAATAATTATAAATTTACCATTTTTTATGGATTTTTTTTCTTTATTTTTTGGAACAGTTTCTAGG…
