# Supplementary material for: Transcriptomic and the Pectinase Gene Family analysis reveals a particular pathway on malformed tomato development
Source: Research Square preprint supplement (doi:10.21203/rs.3.rs-6365605/v1), 2025-04-14
Supplement: Supplementary file 3 [file 348590cd411c632287c63164.xlsx]

## Sheet: Table S1
Table S1 Cds sequences for qRT-PCR analysis
Gene id	Gene name	CDS sequences
MPK3		ATGGTTGATGCTAATATGGGTGCTGCTCAATTTCCTGATTTTCCTAAAATTGTCACTCATGCTGGACAATATGTTCAGTATGACATTTTTGGTAATCTTTTTGAGATTACTAACAAGTATCAACCTCCTATCATGCCTATTGGACGTGGCGCTTATGGAATCGTCTGCTCTGTGTTTAATGCGGAGCTGAATGAGATGGTTGCAGTTAAGAAAATCGCCAATGCTTTTGATAATTACATGGATGCTAAGAGGACGCTCCGTGAAATTAAGCTTCTTCGCCATTTAGACCATGAAAACGTCATTGGTTTAAGAGATGTGATTCCTCCGCCCTTACGAAGGGAGTTTTCTGATGTTTACATTGCTACTGAACTCATGGATACTGATCTTCACCAAATAATT…
LOC101249702		ATGGCTCTGATTTTGCACTCAACAAATAACAACAAAAATGCCTCAAAGGCACTCATTGCGGCTGAGTACACAGGTGTAAAGGTTGAAGTTCCAAAGGATTTCCAGATGGGTGTGTCAAACAACACACCTGAGTTTCTTAAGATGAACCCGATTGGAAAGGTTCCTGTGCTTGAAACACCTGATGGACCTGTTTTTGAGAGCAATGCTATCGCACGCTATGTTACTAAATTAAAGCCCAACAATCCTCTTTTTGGATCTTCATTGATTGAATATTCTCAAATTGAACAATGGAATGATTTTTCTGCCACTGAAGTTGATGCAAACATTGGACGATGGCTGTACCCACGCCTTGGCTTTCGTGTGTACATCCCTGCGGCCGAGGAAGCTGCGGTAGCTGCA…
LOC101257474		AAGTTGTTACAATATGAAAATTATTCTCATTTTTTTGGTTTTGCTTATCACAGTTTCTGTGATAAGTGCTAAACCTCTCATTGGTTCAACAACTTGTCCTGTACCTAGAAGTAAATGTGGACAGGCATGTATTAAGAGATGTTCACACAAAGGTCACAAAAAAAGATGTTTGTTTTATTGCAACCATTGTTGTGGATGGTGCCAATGTGTTCCACCAGGTTATGTTGGGCAAAATAAAGGATGTTGTTCTTGCTACAACAATTGGAAGACACAAATAGGAGGACCAAAGTGTCCATGATATTTATATATTAATCGTGGAAAAATAGTTTGTCGGAGAATCTTAGTAGTTCAGTTAGTTGTATTGGTTGACTGGTTTACTTGGATTTTCACTTTGTTGGT…
LOC101244677		ATGGTGGGGAAAATCGTGGTTTCTTTGGTATCATTGTTTCTTGTGGTGGGTGTTGTATTGGGAGTGGCGATCGTTGTGCACAAAGGGTCAAAAGATCATGCAGGACAAAATCCTAAAGTCCAAATGAAGGCATCGATTGTGGAGTTCTGTAAACCTGCAGAATTCGAAATAGCTTGTTTTAAGAGCCTTGATGCAGTGTCTAAGAACGATAGTGCTACGATGAAAGACTACCTGTTGGCTTCGTTGCAAGTGACAGGGGATGAAATAAAGAAATCTTTAGCGGTTGTGGAGAAGGGTAATCCTATTGATAATAAAACGGATCCGTACAATCACATGGCAGTAGAGGATTGCAAAGAGCTGTTGCAATATGCTGTGGAGGAACTCCACGACTCCTACTCT…
LAT56		ATGGAGTATTCTTATAGAACAAAAATTAATGTATTATTCATTGTACTCATTCTCTTTGTATTTGCTGCACTCGGGACAGCAATAAACGCTCCGAGGAGGAAACTAACTAAGAAATACAGAGGCCCGTGTATGGCCGTGAATTCAATTGACAAGTGCTGGAGATGTGACCCTTTCTGGGCTGAAGATCGCCAAAAAATGGCTGATTGTGCGTTGGGCTTTGGTATCAATGCAATGGGAGGAAAGTATGGTCCATACTACATTGTCACAGATAATTCTGATGATGACGTTGTTGATCCTAAGCCTGGAACTCTCCGATTCGGGGTGATCCAAAAAGGACCATTGTGGATCACATTTGCCAGAAGTATGAGAATCCGATTGACCAGGGAACTTATTGTTAGT…
LOC100191118		ATGTCATTCGATATGACTTTTTCTTCTTCACCTTCCTCAGAACGCGTTTGTTACTTGCAATGTAATTTTTGCAACACCATTCTTGCGGTTAGTGTTCCATGCAGCAACATGTTAACCTTAGTGACAGTAAGATGTGGGCATTGTGCAAATATGCTTTCTGTTAATATTGGATCTTTAATTCAAGCTCTACCCCTTCAAGATGTTCAAAAGCTGCAAAGGCAACAGTACACAAATGTTGAAAATAATTCTAGTAATTATAAAGCTTATGGTTCATCATCATCATCCTCTTCAAAGTTCAACAGATATTCTTCCATTGTTTCTCCTCAAATTGAACCTAAAATCCCTTCGATTCGTCCACCAGAGAAAAGACAACGTGTTCCTTCTGCGTACAACCGATTC…
EREB		ATGGATTCTTCTTCTTCTTCATCTCAATTCTTCTACTCAATGAATTCTGATTTAAATTCATCAGATTCTTCATACGAATGGTCCAATTTCAACACACAATCTTATCTCCCTTTCAACGTGAACGACTCCGAAGAGATGCTTCTCTTCGGAGTTCTTAACGCTGCTCATGAAGAAACAACATCCGAAACAGTCACATCGCATCGCGTTAAAGAAGAAGAAGTTACCTCAGAATCCGAGGTTATTGAAGCAATACCGGCGAAGGAGAAGTCGTACCGAGGTGTTAGGAGGCGTCCATGGGGTAAATTCGCAGCGGAGATAAGAGATTCTACGAGAAATGGGGTTCGAGTATGGTTAGGGACATTTGATAGCGCGGAAGATGCTGCTTTAGCTTATGATCAA…
LOC101268544		ATGACCATGCATACTAGTCTTTCATCGTGTCGTCTTGGGCCGCCAGCATGTGAGAAGGATGCTAAGGCCCTTCAATTCATCGAAGAGATGACTAGAAATGTTGATTCAGTTCAAGAGAAAGTTTTGGCTGAAATACTAAGCCAAAATGCCAACACTGAGTATCTTCAAAGATTCAAACTTGGTGGTGCTACGGACCGGGATACATTCAAGTCCAAAATGCCAATAATTACATATGAGGAAATTCAACCTGATATTCAACGTATTGCTAATGGAGATCGTTCTCCGATTTTCTCATCTCATCCCGTCTCTGAGTTCCTCACCAGCTCGGGGACATCTGCTGGTGAGAGAAAACTGATGCCCACAACTCAAGATGAGTTAGACCGAAAACAGCTATTGTAC…
LOC101257309		ATGGAGATGTCAAAGCTTTCAACCTTTGTTGTGTTGTTGGTTTTAGGCTTAGCCCATTCTTCAGTGGCCCAAAATTTGCCCCAAGACATTGTTGTAGTCCACAACAAGGCCCGTGCTGAAGTTGGTGTGCCACTTCCACCCCTAAAATGGAACGATACGCTTGCTGCTTATGCCCATGAATATGCCACCACTAGATTAGGTGAATGCACATTGGTGCATTCAGATTCACCCTACGGTGAGAATCTTGCAATGGGCTCCGGTGATTTTACCGCCGTGCAGGCAGTTAATTTGTGGGTAGGAGAGAAAAAGAACTACGATTATGCATCCAACACTTGTAGAGAAGGTATGTGCGGACATTATACTCAGGTCGTCTGGAAAAATACCGAACAAGTTGGATGC…
LOC101254455		ATGGAAGATCATGGAGAAACAAAATTGACAGGAATTAGACAAATTGTGAGACTCAAACAATTGTTACACAAATGGCAAAATGTCACATTTACCCCTAATACTACTAAGGGAAAAAATCACAATCCGAAAGTTGAATGTACAAAATCGTCCTTTAATAATCGAAAAAATGAGACATGCAGAGGAGGGATATCCCCATCTATAAGCAAGAGGCTACGGAGCTCCAATGTTTATTGGGATTCAGACGAGGAGAATTGTCAAAGCCCCGAATCGCCACGTGGCGTCCCGAAAGGATATTTGGCTGTCTATGTGGGCCCAGAACTTAGAAGATTTATAATTCCAACAACTTATTTAAGTGACTCTTTGTTTAAAAAGTTACTTGAAAAAGTTGAAGAAGAATTT…
LOC104645435		ATCATAACAGCTCTCACCAAAACTTGAAATCATACAAAGCTTTCCTCTGCTTTCAAAGTCATTTTACAAGTTCTTTCCTTCCTTATTTGCTCATCTATATTGAACTAAACGACCATGGCTATCCGTATGCCTCGTATAATCAAGAAGTCTTCTACAAGTGGAGACGTTCCGAAAGGCCACTTTGCTGTTTATGTAGGGGAGAAGCAAAAGAAGAGGTTTGTGATCCCCATATCATTCTTGAGCCAACCTTTATTTCAAGACTTGCTTAGTCAAGCTGAGGAAGAATTTGGCTTTGATCATCCAATGGGCGGTGTCACAATTCCCTGTAGTGAGGATGTGTTCATTGATCTTACTTCTCGCTTGAATAGGATCTGAGGCCTTTCCTTTCACAATTTTGTA…
LOC101264326		ATGGTAAATAAATCTGATCACCCTGTTCTGCTAAAAAAACATCAAATGAGTGAAATATTCCAAGAGCCTAAGGGCTTAGAATCAATGTCAGCTGGATTTTCATCTCATAATCAATCATGTCGCGGTAATCAAAGGAAAATGGATGAACATGGAGGAAGCAAGGTGACAGGCATCAAGCAGATTGTAAGACTAAAAGAGTTTCTGAGTAAATGGCAACATGTTACACTTGGTCCTAAGGGAAATGGTAACAATTGCAACAACAACAACAACAACAATAATAATAATCTTGGATCATCGTTGAAACACGGTAGCATTTCCCCTAGAGGAATATCACCTTCGATTAGTATGAGGTTGAGGAATTACAATATATATTGTGATTCAGATGAAGAGAGTTGTCAA…
LOC101260471		ATGACAAAGAAGGTGGTAATTGGTGGAATAGCTTCTGTTCTTGTGGTGGCTTGTGTGGTGGCAGCCTGTGTCACCCTGACTAAACATGATTCTGATACTTCATCAAATGGAGTTGCAACTTCAACAAAGTCAGTTGAATCTATGTGTCAACCCACACCATACAAACAAACTTGTGAAAAGACCCTCTCCGCAGCAAAGAATGTGTCCGATCCAAAGGACTACATCAAGGTTGCATTCGAAGCCACTGTGGCAGACATCAAGAATGCCATCAAGAACACTGAGCCAGTTAAGAAAGCTGCTAGTGATCCTTACACCAAAGACGCTCTCCTTGCTTGTGAAGAGGTGTTTGATCTAGCCGTTGAGGAACTAAGGGGCTCTATCGCTAGGATTGAGAACTTT…
LAT59		ATGGGAGGTCCTAAGATAAAGTATAGCTTCCTGTTTCTATGTATCACTTTTGCTACAATAATACCAAGTCTTATGGCTCATATTGGTCACTACGACGAGGTGTGGAGGAGAAGAGCCGAAGAAGCAAAGGAGTATGCCCGTAAAATTTATGAACCACATCCTGAAAATGTCACGCTTGCATTTAACCAAAAACTTCGGGACACGATGAAGGAATTAAAGAAAGTAAAAGGTACACATAATAATAGCACAAGGAGGGGTCTAGGGACAAAAAAGTACACTGGACCATGCATGGTCACAAATCCAATTGATAAGTGTTGGAGATGTGATCCTAATTGGGCAGACAATAGGAAAAAATTAGCAGATTGTGCAATGGGATTTGGATCTAAGGCCATTGGTGGC…
LOC101263150		ATGACAATTATTAATGGATCATCTTTAGCCCTCATTCTTGTTTTGTCAACTTTGGTTACCTGCAAATGCAATGCAGCTGGGGTTCCTTTAGCTGATCAAACCATTTTTAATGTCATGGATTTTGATGCCAAACCTAACTCAGAACTTATGAGCACACAGGCATTTATGAAGGCGTGGCGAGCTGCTTGTGATTTCACTGGTCATGCAAGAGTTTTTGTCCCTCCAGGGGTATATACACTGGGAGAGACCGTATTTGCAGGACCCTGCAAAGGGACACATTCTATAATACTTGAAATTGCAGGAACTTTAAAGGCAGTGCCTGATGTTTCTGAATATTCAAACTTTGCTTGGATTTCGTTCGAGTCTATTAATGGCGTTATCATTACTGGTGGAGGCACT…
LOC101267809		ATGGGGGTTAACAAGGTTGCAATTGGTAGCATTGCTTCACTTCTTCTAGTGGCTTGTGTGGTTGCAGCAGCCATTTCAACTACCAGCAAGAGGAATGAAGATAATTCATCTAATAATAACAATGATTCTCAAATTTCAACTTCTGCAAAGTCTGTTAATGTTATTTGTCAACAAACTGATTATAAAGAAACATGTGTAAAAAGTCTTGCTAAGGCTAACAACACTAATGATCCAAAAGACCTACTTAAGGTTGCGTTTGGCGCCACGATTAACGATCTCTTTGACGTTATAAAAAATTCCGCCTTGTTGATCAACGAGGCCTCGAAAGATCCCCGGACGAAAGACGCGTTGAAGACGTGCGGGGACCTCCTCGACGTCGCGATCGACGACGTGAGGAGG…
LOC101265160	SlCRCa	ATGTCTTCCTCATCTCCTAATTCCTCTTGTCTCAACTTATTGGAATCTGCTGATCATAAAATTAACACCATGGATCCTTCTGAACATCTTTGCTATGTCCGTTGCAGTTTTTGTAACACTATACTCGCGGTGGGAATACCATGCAAGAAGTTGTTGGATACTGTGACAGTGAAATGTGGGCATTGTGGTAATCTTTCCTTTTTAAGTAGTAGACCTCCAATTCAACCACAATTTTTTGATCACCAACCCATTCTTCAGCATCAAGATTTCTTCAACAATTTCAAGAAGGGACAGTCTTCATCTTCAAGTGAACCATCATCTCCAAAGGCACCTTTTGTTGTAAAACCTCCTGAGAAGAAGCACAGGCTACCATCTGCTTACAATCGGTTTATGAAGGAT…
LOC101262914	SlCRCb	ATGGATTATGTTCAATCTTCTGAGCATCTTTGCTACGTCCGTTGCAATTTTTGTAACACTGTTTTAGCGGTTGGAATTCCATACAAGAGGCTAATGGATACTGTGACAGTGAAATGTGGCCATTGTAGCAATCTTTCATTTTTAACTACTAGACCTCCAATTCAAGGTCAATGCTTTGATCATCAACCCAATATTCAGGGTTATTGTAGTGAATTAAAAAATAAGGGGCAAGCTTCATCATCTACCTCATCAACTTCTAGTGAACCTTTATCTCCAAAGGCACCTTTTGTTGTAAAACCTCCTGAGAAGAAACACAGGCTTCCATCTGCCTACAATCGATTCATGAAGGAAGAGATACAACGTATCAAATCTGAAAATCCAGAGATACCACATAGAGAA…
wus	SlWUS	ATGATGGAACATCAACACAACATAGAAGATGGTGGTAAAAATAGTAACAACAGTTTCCTGTGCAGGCAAAGTAGTAGCCGTTGGACGCCAACGAGCGATCAGATAAGAATATTGAAGGATCTCTACTACAACAATGGAGTTAGGTCTCCAACTGCTGAACAGATTCAGAGGATATCTGCTAAGTTGAGACAGTACGGTAAGATTGAAGGCAAAAATGTGTTTTATTGGTTTCAGAACCATAAAGCTCGTGAAAGACAAAAGAAGAGGCTCATTGCTGCCGCCTCTGCCACTGATAATAATAATATCTCTTCCATGCAAATGATTCCACATCTTTGGAGATCTCCTGATGATCACCACAAGTACAACACTGCTACTACTAATCCAGGTGTCCAGTGTCCA…
matriochka	SlIMA	ATGAAAAAAGTTTTGAGGAGAAATGATTACTCAAGAAATTCTACAAATTCATCCTTTACCATGAGGAGAGTGAGATATGTTGAGTGCCAGAGAAATCATGCTGCTAGTGTCGGTGGATACGTTATCGATGGGTGCCGGGAGTACATGCCCGAGGGCACTACTTCCGGCACCCTAAATTGTGCAGCCTGTGGCTGCCACCGCAATTTCCACAGAAGGGAAGTGGAAACTGATGTTGCTTCTGAATGTACTTCCGCTTCTTCTACTACTAAATGA
LOC104645994	SlKNU	ATGGCGGACCACACCCACCTAGTTTATGATTTCTGGAACCAGTCTAACTCCGTTGCCCCAGATATTATGCTGGAACCACCCATGATCCCTAAACCTAAAGTAGCTCCATCTTCATCTAGAATGTTCTCTTGCCTCTATTGTTCCCGTAAGTTCTGCACTTCTCAAGCACTTGGAGGACATCAGAATGCTCACAAACGAGAAAGAGCCGCTTCTCGCCGGAATATGTTCTCTACCGACCCTAACAATAACAATAATAGGCTCCAATTCCATTTTCTTCACAACAACAATGAGAATGTGCCTCAACAACACAACATCATCAATGCTAATTACTCCTGCCAGCTCCAAGTCCAACCACCGCCTCCTTCAAACAATAGCTTGTGCTCCTCCTCATCCGCCGTT…
LOC101262960	SlTPL	ATGTCTTCTCTTAGCAGAGAATTGGTGTTCCTCATACTTCAGTTTCTAGAAGAGGAGAAATTTAAGGAGTCCGTTCACAAGCTCGAGCAAGAATCAGGATTTTTCTTCAATATGAAGTACTTTGAGGAGAAAGTACATGCAGGTGAGTGGGACGAAGTTGAGAAGTACTTGTCCGGATTTACCAAAGTTGACGACAACAGATATTCAATGAAAATCTTTTTTGAGATTAGAAAGCAGAAATATCTTGAAGCTCTTGATAAGCAAGACAAGGCAAAGGCAGTTGAGATTCTTGTGAGTGATTTGAAAGTGTTCTCTACATTCAATGAGGACCTTTACAAAGAGATCACTCAACTCTTGACGCTTACCAATTTCAGAGAGAACGAGCAGCTTTCGAAGTAT…
LOC101254943	SlHDA1	ATGGATGTTGGAGGAAACTCCTTAGCATCTGGTGCAGATGGAAAGAAGAGAAAAGTAAGTTATTTCTATGATCCTGAAGTTGGTAATTACTATTATGGACAAGGCCATCCAATGAAGCCACATAGAATGCGGATGACACATGCTCTTCTTGCCCACTATGGTCTATTACAACACATGCATGTTCTGAAGCCAAATCCTGCTAGAGATAAGGATCTCTGTAGGTTTCATGCTGATGATTATATTGCTTTCTTGAGAAGCGTAACACCAGAAACACAGCAAGATCAGCTGAGGCAGCTGAAGAGGTTCAATGTCGGGGAGGACTGTCCAGTTTTTGATGGTCTTTATTCCTTCTGCCAAACCTACGCTGGAGGTTCTGTTGGTGGGGCAGTTAAGTTGAAC…
LOC104644782	SlCLV3	ATGTCTTTGATCAATGCTAAATATTTCAATCTCTTTGTCTTGCTGATCTGTTTTTTAGTAATTCAAGAATCTCATGGTCTGTCTCTAAAGGAAGTTGCTCCTGTGAAACTCCTAAACAGAAAGGTTTTAGAAAGGCAGTGGGCTGCATTTGGGAAGGTATACTACAAGCATGCAGAGAAGATTAATGAGAAGTTTGCTGATTGGGAGCTAAGAGGAGTTCCAGCTGGTCCTGATCCATTGCATCACAATGGTGCTAGTCCTAAGAAACCTAAGACTCCATAA
TAG1	SlTAG1	ATGGACTTCCAAAGTGATCTAACCAGAGAGATCTCACCACAAAGGAAACTAGGAAGGGGGAAAATTGAGATCAAAAGGATCGAAAACACGACGAATCGACAAGTAACATTCTGCAAGAGGCGCAATGGTTTGCTTAAAAAGGCTTATGAATTGTCTGTGCTCTGTGATGCTGAGGTTGCTTTGGTTGTCTTCTCAAACAGAGGCAGACTCTATGAGTATGCCAACAACAGTGTGAAAGCAACAATCGAGAGGTACAAGAAAGCATGCTCAGATTCCTCAAACACTGGTTCAGTATCCGAGGCCAATGCTCAGTATTACCAGCAAGAAGCCTCCAAACTGCGCGCACAAATTGGAAATCTGATGAACCAAAACAGGAACATGATGGGTGAAGCTCTTGCT…
Solyc02g067450	SlPL2	GATAAGCTTTAATATTTTCTCTGTTTAAAACAGAGTTTAAACTTAAACTTAAAAAAAAAAAATTGTGGTTGGAGGGTCCAGATCTTAATGAGCCAGTAGTTCGACCCTTCCCAAACCACCAATAAACAAAAATAAAAAAAAATAACGAACAGTCAATCTAAAATGACGAAGTCCCTCTTTATTATATTTTTTGTATTAGGTGCAATAATTCCTGCCTTCAATGCTCATATTGGAGATTTTGATGAAGTGTGGAGGAGGAGAGCCGAGGAAGCAATAAAGTTCACTCATGAAACGTATGAGAGCGAGCCTGCCAATATCACCTTAGCATTTAACCAGAAAACTCGCCATACTGTGAAGGAATTAAGTACAGTAGTATCCAAGAATGAAACAATTAGAAGG…
Solyc02g087670	SlPL4	AAAAAACACATCTCTTTACGTTGCTGCTTTTTTAGGCTACAACAAAGAGGGTCTCACCTCTAAACAGCCAAAGGGTTTGACCCAATTAAGACCTTCTTTCGTTTTTATTTAGAAAAAAAAAATACTTTAACTAGTTAAATTATCATAAATCTTTAAATGGGAGGAACAAAGCTGGTATATTTGTCTCTGTTACTATTTTCCACATTTTTGGTAATAAATGGTCACATTGGTGAGTTTGATGAGGTGTGGAGGAGGAGAGCCCAGGAAGCAGATGAATGGGCCATAAAGGCTTACAAGCCCGACCCCATCAATGTCACCCTTGCATTTGCTAAGGAAACTGGACAGGCCTTAAAGGAAATAAAGGAAGCGAAGCTGGCAGTAAATGGAACAAGGAGGGAA…
Solyc05g007080	SlPL11	GACAAACAAAAACAAAAAAAAGGAGAAAAAAAAAATATCTGCTACAAAAAAAAATGGCCTCTATTAGTTTTAATAATTCAGTTATTTTTCTGTTTTCCCTTTTCTGTTTTTCTTCTATAATCCCAAAATTATATGCTAATATTGCTGATTTTGATCCTTATTTGGAAAAAAGAGCTGAAGAAGCCCTCCAATCTTCTCTTGCTGCTTATAATGAAAATCCTGAGGGTGTCACTCAAATTTTCAACAAAGAAGTTGGAGAAACACTTCTCAATGGCACAAGGAGGCATTTGAAGGAAAAAGATAAAGAGGACAAGAATGACAAGGATGATAAGGAAGGTGATGAAAAAAGTGTTGATGGTTGCAAGGCATACAATCCAATTGACAAATGTTGGAGATGTG…
Solyc05g014000	SlPL12	CCCTTCATTCCAAACTCCATTATTTTCTCTTCCCTTAACAACACAAAGGGGATTTCAAATGGGAATGCCACTTTCTTTTCTTCTCCTTCTTACTCTATTATCTCCTATCTTCACATTCTCCTCTCATGTTCCTGACCCTGAAGTTATAGTCCAACAAGTTAATGAGAAAATCAATGCATCAAGAAGGAACTTAGGTTATTTATCATGTGGAACAGGCAATCCAATTGATGATTGTTGGCGATGTGATCCTAATTGGGAAAAAAACAGACAAAGACTAGCTGATTGTGCAATTGGCTTTGGTAAACAAGCAATTGGTGGTAAAGATGGTAAAATCTACGTAGTTACTGACACTAGTGATGATCCAGTAAATCCAAAGCCAGGAACATTAAGATATGGTGC…
Solyc01g057220	SolycPME4	CCATAGTCCAAACTAATTTCCATTTTTGTCTCTCTTTTCAATATCCTCTCTACACATTTAATCTTAGAAATATAAATAATGAAAGGCGGGAAGATTTTTGCATTTGGTATATCGATTATCCTGGTTGTTGGAGTAGTTATTGCAATTATTGCAAGCAATAATCGTACACAAGACTCTTCGGACAATGATGAAAAGGATGACAAAGTGCTTTCTACCACATCCAAATCCATTGCTTCTGTTTGTTCACAAACTGATTTTAAGAAATCATGTGTTAATAGCCTTAGCTCTATGGCCAACAACCAAAGCGCCACCCCAAAGGAATTCCTCCTAAAAGCCATTGAGGTGGCCATTCAGGAAGTTAGAATCGGAATAGACAGGTCCACGTATATTGGCAAAGCA…
Solyc01g066360	SolycPME5	TAAAAAAATGGAAACACTAACAACCTCCTCTTTTTCTTAGACCATTTCATATCCTCACATATTTAACAGAAACCAACACTATAAATAGTTTCTCCATTTTTTAGGAAATACATCTTTCAGAGCCAAGGGGCATGTACGGTCTCTAATAAAAAATCCCCAAAAGCTCTCTATCGATTTAACTATACAAAAACATTTTTTTTTTTACTTTGGGAAAAATACATAAAAGCATCAAAATATTATGGCTAAAAAATTAGTCATTGGTGGCATAGCCTCAATTCTTGTGGTGGCTTGTGTTGTTGCAGCATGTGTCACCATTACCAAAAAGAATGCGAGCGATGGTGGTGATGGAGCTAGCAATGGTGGCATTTCAACCTCTACAAAATCTGTTCAAGCAATGTG…
Solyc01g068120	SolycPME12	ATTCCGCAACACTGCTGGTCCAGAGGGTCAACAAGCTGTTGCACTTAGGATCTCTGGAGACAGGGGAGCAGTATTTGACTGCAGCATAGAGGGAAACCAAGACACCTTGTACTACCAAACATACCGTCAATTCTACCGCAACTGTGTAATATCTGGTACCGTTGATTTCATCTTCGGGTGTGGAACAGCTCTCATCCAGAACAGTGAGATCATATTGAGGAGGCCTAGACAACAAAGCAAGAACACCATCACAGCTGATGGAAAGGACCAAGCAGACAAAAACACTGGGGTAGTACTTCAGAACTGCAAAATTGTACCAGAACAATCACTTTTTGAAGATAGGTTCAAATACGAACACTACTTAATGCGCCCATGGAAGGCATATTCCACCAATGTTTA…
Solyc01g099940	SolycPME18	TATCCTCCGTCAATATGCTTGTTTCCCTCTAAGCTTCTTATCCAGAACAGAACAATGTTTGGGGGAAAGCTATAACTTGTCTTTAGTCTCATTCGTTCTTTTTTCAGCCATTTTGAGGAGAGGGTCAAGAGCAATCCTCCAGGCCCTTCTCCGTTACAATTTGGTGAATTGCACGTGAAGCAGTAATATTTCTAATTATTTGTTTTACAATATCAAATACATTTTAAGAGTAGAGATCAAGCAATGGCGGGAAATAATCGTAAGAGGAATTTCACCATTATTGGTGTGTGTTCATTAATCTTGGTGGCTATGGTAGTTGCAGTAGTCGTAACGATGAATTGGAATGATAAAGAAGCTGAGGCTCAAGATGTTACGAGTACGAAAAAAGCTATTGAATCC…
Solyc03g078090	SolycPME30	ACAAACTAAATTACATCAATGGCATTTGGTAATTTCTCTCTGTTAATCCTCTTTTTATTATTCTCGCTCTCTTATGCCATTGATGATCACCACCACCATTTACCGCCTGAAATTCGAGAAGCTTGTAAAGTCTCACATGATCCATCAAAATGCGAGGCTTCTTTCCATTATCATTTTCCTTCAAAATTCTCAACCCTTCAAATAATCTATTCAGCACTAGCTCGCTCTATGCATAAACTCACCAAGGCCCAGGCCTTGGTCAAGGATATACAAAAATCTGCCGCTGGAAACGTGAATGTTACCATTGCCACAGTAAATTGTGCGGAGGGACTCGCGTTTTCAGAATACAGATTTAAGCAAACGGCTAATGATGCATTGGCAAGAGGTGAAATTAAGGAC…
Solyc05g052110	SolycPME39	TTACGCAATCAAACACTCATTAAAATATGAGTAGTTACCTCAATTTTCTTTTGTTAAAATTTATAAAAAAAAATTAAACCAAAAATATTTCCCATTCAAGAAACTAAGAAACTAAAAAATCCAAAAGAAAATATTAAAAATGGCTGGAAAAAATACCATATTTGTTGTGGAAACAATTATCATAACATTTCTTTTATTAAATATTATTGAAGTATTTTCTGATGATTTAGTTCCAATTCCAGCTGATAAATCACAATTAAATAGTTGGTTTGAAGCTAATGTTAAGCCATTAGATGCAAGAAAAGACACTTTAGACCCTGCCCTTGTAGCTGCTGAGGCTAATAAAACTATCATTAAGGTTAGGACATATGGAAGTGGTGATTTCAAGACTATAACAGA…
Solyc05g052120	SolycPME40	ATGTCTGGAAAAAAATCAATTTTGCGTGATAAATCACAATTAAATAGTGGGTTTGAAGCTAATGTTAAACCATTAGATGCAAGAAAAGACACTTTAGACCCTGCCCTTGTAGCTGCTGAGGCTAATAAAACTATCATTAAGGTGAGGACAGATGGAAGTGGTGATTTCAAGACTCTAACAGAAGCTGTTAAAAGTATTCCAGAAGATAATAAAAGAAGAGTTATTATTTGGATTGGAGGTGGAAATTACACTGAAAAAGTCAAAATTGAGAGAAATAAGCCTTTTGTTACGTTATATGGAGACCCTAAAAATGTCCCAAATATTATATTTAGTGGAACTGCAAAACAATATACTATTGTTGAAAGTGGCACTGTCATTGTTGAATCTGAATACTTCAGT…
Solyc07g017560	SolycPME48	GTCAAATTTACACACTCAAGTAACTCTGACCAATTTGTCAAGTTCCACTAAATAAGAGGGAATAAACAGAGAAATAAATAAAACAAAAAAAAAAGAACAAATAAATAAACTAAGCACCAAATAAAGCATCATCTTGGTGTAACATCTCTGCCTTGGTTTGGGATCCAGGGCAGAGATCTTTTTAATCTCTGTCTCTATTCCGGACTCGAATCCAAAATGGCGTTTCAAGATTTTGATCAAATTTCAGAGCGGAGGAAGCTCGAGAGACAGCAAAAGATGAAGAAGAGGATAATGATTGGTGTTGTATTGCTACTCCTCATTCTCATTGCTGTTGCTGCTTCTGTTGTCTATTTTGTTGTGTTTAAAAACAAGAGCGGTGATTCCTCCTCCGCTAGTAAA…
Solyc12g099230	SolycPME78	ATGAATATCAATATTACATTATTTTTTGTCATTTTCCTAGTTAATTATGTAATATTCTTGGATTTTGTTCATGGTTTATCTGTGAAAAATGTGATTGATTCTCATGTATTAACACAAAAAATTAGCACTAATCGTACAATTATAGTGGATATTAATGGACAAGGGGATTTTAAGTCTATTCAAGCAGCAATTAATTCAGTTCCAAATGGGAATTCCAATTGGGTCATTATCCATGTTAGAAAAGGGACATACAGAGAAAAAGTGAATGTACCTCCAAAAAAGTCCTACATATTTATGAGAGGCAATGGAAAAGGAAGAACATCAATTGTATGGTCAGAGAGTTCCATTGATACAACCAAATCTGCTACTTTCAAAGTTGAAGCTCCTAATTTTGTTGCA…
Solyc12g099410	SolycPME79	ATGGCGGAGGCCGGTAAAAAGAAAATAGTAATTGCTGGAATTGCTTCAATTCTTCTAGTTGCTTGTGTTGTTGGTGCTGCCGTTACGTTTACAAAAAAAAATGATGATTCGACATCTAATGGGGGTGAAATTTCGAGCTCTACCAAATCAGTACAAGCCATGTGTCAACCTACTCAATATAAAGAAACATGTGCAAAATCACTTGGATCAGCTAAAAATACAACCAATCCAAAAGAGTTGATTAAAGCCGCATTTGACAATACTTTGACCGAAATTACAAATTCAATTAAAAATTCAGCTCCATTTAAAGAAGCTGCAAATGATCCAAGGACTAAGAATGCTTTAAAAGTTTGTGATGAAGTTCTTGACCGTTCGATCGAAGAGATCAAGAGATCATTT…
Solyc04g015530	SlPG15	ATGGAGAAATTCAATGAAGAAGAAGATCAAGCTAAGGTTACAACAATTAATGTGGATAGCTTTGGAGCTAAAGGTGATGGAAGTATAGATGATACAAATGCATTTCAAAAAGCATGGAAAGAAGCTTGTTCATCTTCACATGTTGTGAATTTTGTGGTGTCCCAGAACAAGAAATATCTTCTCAAACCAATCAAATTTTATGGGCCATGCAAATCTTCCATTACAATGCAGATTTATGGAACCCTATTAGCATCTGATGATACTTCAGATTACAAGAAGGATAGTAGGCACTGGCTTATTTTTGATAGTGTTCAAAAATTGGTTGTTGGAGGAGCTGGAGTTATCAATGGCAATGGCAAAATTTGGTGGCAACATTCTTGCAAAATTAATAAAAAATTG…
Solyc06g068040	SlPG17-2	TTAATTAACAGAATTAGACGGGGGAGCTGATCGATCATGAGATTTTATAATGTTTCTATTTTTGCATCACTACTATATAATACTATATTTTCCTTCTTGCTTTTTGTAAATGTGAACAGTTTTGATTCCTTCATTCAGTTTCCCACATTGGAAGATTCAAGAGGCAAATCAGTATCCCTTCTTTACGTGAATGAATTTGGAGCCAAAGGAGATGGCATCACCGATGACACTAAGATTTTTCAATATGTTTGGAAAAGGGCGTGTGCTTCATTCTTAAGACCAAAAATTATAGTCCCAATTGGATATTCATTCTTAGTTCAACCAATTGATTTTGTTGGGCCATGCAGATCAAAGATTTCTCTAATAATTGAAGGTTCAATAGTAGCACCAAAAGATCCA…
Solyc12g096740	SlPG24-1	ATGAGTCCCTTAGCAATTTTCTTCTTCTTTTTCTTCAACTTATCATTAGCAAAAAACACCATTTACAATGTCCAAAATTATGGAGCAAAATCCAATGGAAAAATAGATTCATCAAAAGCATTTTTAAGTGCATGGGGATCAGCATGTGCTTCTACGAGCGCGTCCACTATTTATGTGCCACGTGGAATTTACTTGATTCGTAAAATATATTTCAATGGTCAAACATGCAAAAGTAACGCTATTACTATACGTATCGATGGAACTCTCTTAGCTCCTTCTGATTATAATGTGATTGGCAATGATGGAAATTGGATAACATTTGAAAATGTCAATGGAGTTTCTATCTATGGTGGAATCTTTGATGGTCAAGGTGCTAGTCTTTGGACTTGCAAAAAATCC…
Solyc12g096750	SlPG24-4	ATGAGTCCCTTAGCAATTTTCTTCTTCTTTTTCTTCAACTTATCATTAGCAACAAACACCATTTACAATGTTCAAAATTTTGGAGCACAATCCAATGGCAAAATAGATTCAACAAAAGCATTTTTAAGTGCATGGGGTTCTGCATGTGCTTCTACGAGCGCCTCCACTATTTATGTGCCACGTGGAAATTACTTGATTCGTAACATATATTTCAATGGTCAAACATGCAAAAGTAACGCTATTGCTATACATATCGATGGAACTCTCTTAGCTCCTTCTGATTATAATGCAATTGACAATGATGGAAGTTGGATAAAATTTGAAAAAGTCAATAGAGTTTCTATCTATGGTGGAATTTTTGATGGTCAAGGTGCTAGTCTTTGGGCTTGCAAAAACTCT…
Solyc12g019180	SlPG24-6	ATGAGTTACATTATTCTTTTCCCACTTATTCTCACAAACATAATCATCTTTTTATTATTCAATTCATCTTCAGCTGCAAATTCCATGTACAATGTCCAAACTTATGGAGCCAACTCCGATGGAAAATCGGATTCATCCAACGCGTTCGTTAGTGCATGGACTGCAGCGTGTGCATCTACTAGCGCGGCCACTATTTACGTCCCAAAGGGAAGTTATCTATTGAACAATGTATATTTCTTTGGCCAATCGTGCAAGAGTAATGACATAACGATACATATTGAAGGCACACTTATAGCTCCTTCTGATTATAACGTTATTGGTAAATCTGGTAACTGGATTAAATTTGAACGAGTCAATGGAGTTTCCATCGTTGGTGGAACACTAGATGGACAAGGTACG…
Solyc02g067630	SlPG24-8	ATGAGTCCCTTTGCTATTTTCTTCCTCTTGTTAATTAACTCATCATTAGCAGCAAATACAAATATTTACAATGTCCAAAATTATGGAGCAAAATCCGATGGAAAAACTGATTCATCAAAAGCCTTTTTGAATGCATGGGCAGCAGCCTGTGCTTCTAATAAACCTTCCACTATTAATGTGCCAATTGGAAAATACTTAATTCACAATGCAAACTTCAATGGACAAACATGCAAGAGCAAAGCTATTACCATGCACATTGATGGGACTCTCTTAGCTCCATCTGATTATAATGTGATTGGCAATGAAGAAAATTGGATAAAATTTGAAAAAGTCAATGGCCTTTCCATCTATGGTGGTACCTTTGATGGTCAAGCTGCTGCTCTTTGGGCTTGCAAGAAC…
Solyc02g067640	SlPG24-9	ATGAGTCCCTTAGCAATTTTCTTCCTCTTTTTAATCAACTCATCATTAGCAGCAAATACCAATATTTACGATGTCCAAAATTATGGAGCAAAATCCGATGGAAAAACTGATTCATCAAAAGCCTTTTTGAATGCATGGGCAGCAGCCTGTGCTTCTAATACCCCTTCCACTATTAATGTACCAGCTGGAAAATACTTAATTCACAATGCAAACTTCAATGGACAAACATGCAAGAGCAAAGCTATTACCATGCACATTGATGGGACTCTCTTAGCTCCATCTGATTATAATGTGATTGGCAATGAAGAAAATTGGATAAAATTTGAAAAAGTCAATGCCCTTTCCATCTATAGTGGTACCTTTGATGGTCAAGGTGCTTCTCTTTGGGCTTGCAAGAAC…
Solyc10g047570	SlPG36	ATGACTTCAAAGTGTTGTTTCACAATAGGCGTTATATTAGGCCTTGTTTTTGTATGCACAAATGCTCAAGAAAAGGTCTTCAATGTCCTTTCTTATGGTGCTAAAGCAGATGGAATGACGGACGATAGTGAGGCATTTTTGAATGGTTGGAGGGATGCATGCATATGGAATGGAAACGGGACATTGTTGATACCTTCAGGGGTATATATGATAAATGGTGCAGTCTTTAAAGGACCATGTAATGGATCTGTTACGACCTTTGAAATGAAAGGAGTTATTAAAGCTCCAACTGATCCTAATATATTCTGCAATACTGGTTCTTGGATTGCTTTTCAATATATTCATGGCTTAGATATTAAAGGACATGGAACATTTGATGGACAAGGGGATTGTGCTTGG…
Solyc00g030510	SlPG38-1	AAAAATGGATATGAAAATCAAGTTTGTTTATTTTGGATTGGGTGTGTTATTTCTAGCACATTTTGGAGAATCTCAAAATGCAACTTTTGATATAACCAAATATGGTGCCACAGCCAATGCTGATATTAGTGAGGCTGTTGGAAAAGCTTTTAAAGAGGCATGTGCATCAACAAGTCCAAGTACAATTGTGATCCCAAAAGGAACATTCCAAATGAACCAAGTGCTATTAGAAGGACCATGCAAAGGCCCTATTGAACTTCAAATTCAAGCCATTTTGAAAGCACCAACAGATCCTAATGCAATTAAAACTGGTGAATGGTTAACAGTAAACAAACTTGATTTCTTCACAATGTCTGGTGGTGGAACACTTGATGGTCAAGGTAAAGAAGCATGGGAATG…
Solyc07g044870	SlPG38-2	ATGGAATTAAATATCAAGATATTATTTGTATTTACATTAATGTTATTTTTAGCACGACTTGGAGTGGCTCAGGCACCAGCAGCACCAACAGGTCAGCCAGGAGTGTTTGATGTTACCAAATTTGGTGCAACACCTAATGGAGATATTAGTAAGGCAATATTGGATGCATTTAAAGAGGCATGTGCATCAACAAGTCCAAGTAGAGTAATAGTCCCAAAAGGTACATTCCAAATGAAACAAGTAAAATTAGAAGGTCCATGCAAGGCACCACTTGAGTTTCAACTACAAGGCACTTTACAAGCTTCTCCAGATCCTAAAGCACTCCCTGAAGGTGAATGGTTTACTGTTAATTATGTTAATCAATTCACATTATCTGGCACTGGCATTTTTGATGGACAA…
Solyc06g009200	SlPG45	CCCTTTCCTTCTTTAATTTCTCACTTTTTTTCTTCTTTATTTTTATTTTTTTCAATTTCCTATTTAGGCCACAACCACAATGGCTATTCCAAAAGGATTAGAAATCAATAATATTGTAGGATTATTCTTACTTTTGGGTATAGCCATTTTATCATCAAAAGTTGCAGAATGTGCACCTTTTGGTTCGCGTCGTGGCCTTATGGAGACAGTTTTCGATGTTACCAAGCACGGAGCTAGACCAGATCCCACTGCAGATAGCACTCGGGGATTTATGATGGCATGGAGAGCAGCATGTCAATCAACAGGCCCAGCAAAAGTTGTTATTCCACCAGGAACATTTACTACAGGAGAAACTATTTTTCAAGGCCCATGTACATGTCCAAAGCCCATTATTATTGA…
Solyc03g007940	SlPG56-2	TTGGAATAAGATTAATATACTTACCAATATGAAAATCTCTTAAAATGGTTAGTTATTAAATGTTTAGTTTGACGCACAATCTACACTACACTATATAACAGAATCATACAACCAATATTCATTCATTCGAAAGCTTTTTGTTCATCAATGGAGTTGTACCACCAATCAACATGCCATTTTCTAGGGAAACTGATTATCGCTTTGACATGGGGAATACTTTGTCTTAGAGCAGCGGACTGTATTGAGTATGAAGCTTTAAGTTGTCGAAAACACACAGCATTATTGACAGATTTTGGAGGCAAAGGTGACGGAAAAACGTCGAACACAAAGGCATTTCGAAAAGCTATACATGAACTGAGCAAATTTGCAACAGATGGGGGAGCACAGCTCATTGTTCCT…
Solyc03g007950	SlPG56-3	GAACTCCATTAAATTATAGAATTTTACAACACATACAAATTTGCATGTGGTAAATTCAATTTCTCTTTACTTCTAAATAGCAAAGTTTTCGCCATAATAATTGGAATAAGATTAAATATACATACTTACAAATGTGAAAACCTCCTCAAATGGTTAGTTATTTTAGTTTGACGCACAATCTACACTACACTTATATAACAGAATCAAATAACCAATATTTATTCATTCGAAAGCTTTTTGTTCATCAATGGAGTTGTATCACAAATCAACATGTCATTTTCTAGGGAAACTGATTATCGCTTTGACATGGGGAATACTTTGTCTTAGAGCAGCGGAATGTATTGAGTATGAAGCTTTAAGTTGTCGAAAACACACAGCATTATTGACAGATTTTGGAGG…
Solyc07g015870	SlPG8	GAGTACATCTTTAAATCTTTCTCTCATTAAATCAAAATGTCGAGGTTTAGTACAGATCTCATGAATTTAGTTATTTTGTTGGTTTTAGTAATCTATTATAGTTTGGAGAATGCAACATGTAATGCTAGGTCACAAGAGTCAAGTATTGAGAATTTTTATGTCTTTAATGTCTTAGATTATGGTGCTAAAGGTGATGGAATCACATATGACACCAAAGCATTTGAAGCAACATGGATTGAAGCTTGCAAAGTTGAAGGTTCAGTTATGATGGTTCCATCAGATTATGATTTCCTAGTTGGTCCTATCACTTTTTCAGGGTCACATTGTGAGAAAAACATTGTTTTCCAGTTGGATGGGAGAATTATAGCACCAACAAACCCTAAAGTGTGGGGTGTATTA…
