# Supplementary material for: Transcriptomic and the Pectinase Gene Family analysis reveals a particular pathway on malformed tomato development
Source: Research Square preprint supplement (doi:10.21203/rs.3.rs-6365605/v1), 2025-04-14
Supplement: Supplementary file 4 [file 39ca4dd23d77031616dc2b55.xlsx]

## Sheet: Sheet1
Table S2 Transcriptome data output statistics
Sample	RawReads(M)	RawBases(G)	CleanReads(M)	CleanBases(G)	ValidBases(%)	Q30(%)	GC(%)
QT2_UP_1	52.7	7.5	49.45	7.04	93.83	94.99	43.54
QT2_UP_2	52.91	7.47	49.2	6.95	92.99	94.93	42.85
QT2_UP_3	49.08	6.94	45.73	6.47	93.17	94.9	42.75
QT2_HP_1	51.66	7.32	48.27	6.84	93.44	94.99	42.85
QT2_HP_2	51.4	7.32	48.39	6.89	94.14	94.98	42.23
QT2_HP_3	50.15	7.16	47.28	6.75	94.28	94.98	42.8
QT2_FP_1	44.36	6.35	42.01	6.02	94.72	95	43.27
QT2_FP_2	49.01	6.99	46.12	6.58	94.1	94.81	43.82
QT2_FP_3	52.68	7.48	49.38	7.01	93.73	94.65	43.81
QT57_UP_1	52.07	7.34	48.22	6.79	92.6	94.68	43.65
QT57_UP_2	53.35	7.57	49.76	7.06	93.27	94.69	43.54
QT57_UP_3	50.31	7.09	46.68	6.58	92.78	94.72	43.42
QT57_HP_1	50.07	7.1	46.81	6.63	93.48	94.75	43.16
QT57_HP_2	51.28	7.3	48.23	6.87	94.04	94.7	43.46
QT57_HP_3	48.56	6.89	45.49	6.45	93.69	94.68	43.11
QT57_FP_1	50.45	7.14	46.63	6.59	92.42	95.37	44.48
QT57_FP_2	51.68	7.39	48.87	6.99	94.55	95.43	43.98
QT57_FP_3	50.07	7.09	46.75	6.62	93.36	95.33	43.34
