# Supplementary material for: Transcriptomic and the Pectinase Gene Family analysis reveals a particular pathway on malformed tomato development
Source: Research Square preprint supplement (doi:10.21203/rs.3.rs-6365605/v1), 2025-04-14
Supplement: Supplementary file 5 [file 799dd61b7a5368f7bef75b55.xlsx]

## Sheet: Sheet1
Table S4 Pectinase gene ID
Gene Type	Gene Name	Gene ID
pectate lyase	SlPL2	Solyc02g067450.2
	SlPL4	Solyc02g087670.2
	SlPL6	Solyc03g058890.2
	SlPL7	Solyc03g058910.2
	SlPL11	Solyc05g007080.2
	SlPL12	Solyc05g014000.2
	SolycPME4	Solyc01g057220.2
Pectinesterase	SolycPME5	Solyc01g066360.2
	SolycPME9	Solyc01g066420.2
	SolycPME12	Solyc01g068120.2
	SolycPME18	Solyc01g099940.2
	SolycPME30	Solyc03g078090.2
	SolycPME39	Solyc05g052110.2
	SolycPME40	Solyc05g052120.2
	SolycPME42	Solyc05g054360.2
	SolycPME47	Solyc06g084620.1
	SolycPME48	Solyc07g017560.2
	SolycPME78	Solyc12g099230.1
	SolycPME79	Solyc12g099410.1
Exopolygalacturonase	SlPG8	Solyc07g015870.2
	SlPG15	Solyc04g015530.1
	SlPG17-2	Solyc06g068040.2
	SlPG24-1	Solyc12g096740.1
	SlPG24-4	Solyc12g096750.1
	SlPG24-6	Solyc12g019180.1
	SlPG24-8	Solyc02g067630.2
	SlPG24-9	Solyc02g067640.2
	SlPG36	Solyc10g047570.1
	SlPG38-1	Solyc00g030510.2
	SlPG38-2	Solyc07g044870.2
	SlPG44	Solyc01g066070.2
	SlPG45	Solyc06g009200.2
	SlPG56-2	Solyc03g007940.2
	SlPG56-3	Solyc03g007950.2
