# Supplementary material for: Transcriptomic and the Pectinase Gene Family analysis reveals a particular pathway on malformed tomato development
Source: Research Square preprint supplement (doi:10.21203/rs.3.rs-6365605/v1), 2025-04-14
Supplement: Supplementary file 6 [file 97594eee5dbfe91be7636034.xlsx]

## Sheet: Sheet1
Table S3 Gene ID and primer information
Classify	Gene iD	Description	Forward primer（5' to 3'）		Reverse primer（5' to 3'）
Intersection	LOC101249702	Elongation factor 1-gamma 2	GAACACCCATCTTGCATCTAAC	CCACAGTCCAGAAGTATCTCTC
	LOC101257474	Gibberellin-regulated protein 4	CGATTCTCCGCCTTGTAATTTT	CTCGTACGATCTTGGCTCTAAT
	LOC101244677	Pectinesterase 4	CTTGATGCAGTGTCTAAGAACG	ATAGAGTAGGAGTCGTGGAGTT
	LAT56	pectate lyase P56	TATGGCCGTGAATTCAATTGAC	GCTTAGGATCAACAACGTCATC
	LOC100191118	FAS protein	AATTCAAGCTCTACCCCTTCAA	CAGAAGGAACACGTTGTCTTTT
Plant hormone signal transduction	EREB	ethylene responsive element binding protein	CGAGGTTATTGAAGCAATACCG	CATTTCATGTCACGTAGCGAAT
	LOC101268544	Probable indole-3-acetic acid-amido synthetase GH3.1	CTTGCTGATGATATCGCATCTG	AACCACCACTGTAATAGTCGAG
	LOC101257309	Pathogenesis-related leaf protein 4	TGTTGTTGGTTTTAGGCTTAGC	CATTGCAAGATTCTCACCGTAG
	LOC101254455	Indole-3-acetic acid-induced protein ARG7	GCAAAATGTCACATTTACCCCT	TTGACAATTCTCCTCGTCTGAA
	LOC104645435	Auxin-induced protein 15A	TGTAGGGGAGAAGCAAAAGAAGAGG	GGAATTGTGACACCGCCCATTG
	LOC101264326	Auxin-induced protein 15A	GCTTAGAATCAATGTCAGCTGG	CTTACAATCTGCTTGATGCCTC
Pentose and glucuronate interconversions	LOC101260471	Pectinesterase	CATTTGTCGAAGCTAGTAACCG	TGCTTCCTGAATGGTCTTGTAT
	LAT59	pectate lyase P59	GAGCTCCAGAGGAACTAATACC	TTGTTAGCTGAAGTCGACATCT
	LOC101263150	Exopolygalacturonase	GTAAATGTTGGCTATACTGGCG	CTCTTGAACATCGACGTTGATC
	LOC101267809	Pectinesterase 21	CACAACTGTCAATTCGATGGTT	CATAACAATAGCACCAACTCCG
MAPK signaling pathway - plant	MPK3	mitogen-activated protein kinase 3	GCTTGTGTTCACTCGACTATTC	TGAATGAGTGGAAGACGTACAA
Literature	Solyc01g010240	Protein DROOPING LEAF	CTGAACATCTTTGCTATGTCCG	TCACTGTCACAGTATCCAACAA
	Solyc05g012050	Protein DROOPING LEAF	GGCCATTGTAGCAATCTTTCAT	GCACTGAAAGCTTCTCTATGTG
	Solyc02g083950	wuschel protein	TCTGCTAAGTTGAGACAGTACG	TTGTCTTTCACGAGCTTTATGG
	Solyc02g087970	mini zinc finger protein	GAGATATGTTGAGTGCCAGAGA	AAGCAACATCAGTTTCCACTTC
	Solyc02g160370	Zinc finger protein KNUCKLES	ACCGCCTCCTTCAAACAA	CAAACGAAGGGTAAGGTC
	Solyc01g100050	Topless-related protein 3	GTCCGGATTTACCAAAGTTGAC	TCTCTCTGAAATTGGTAAGCGT
	Solyc09g091440	Histone deacetylase 19	CACAATACGTAATGTTGCTCGT	ATTCATGTTGCGGCATCTTATC
	Solyc11g071380	protein CLAVATA 3-like	TCTCTTTGTCTTGCTGATCTGT	GGTTTCTTAGGACTAGCACCAT
	Solyc02g071730	MADS-box transcription factor AGAMOUS	ACTGAAGAATCTGGAGCAAAGA	CAATTTCAGCAAACAACAGCTC
Reference	actin	actin	GTGAAAGAAAAGCTCGCTTACA	GCTCATAGCTCTTCTCAACAGA
