# Supplementary material for: Transcriptomic and the Pectinase Gene Family analysis reveals a particular pathway on malformed tomato development
Source: Research Square preprint supplement (doi:10.21203/rs.3.rs-6365605/v1), 2025-04-14
Supplement: Supplementary file 7 [file 97ff91307889097c8d8f6f4b.xlsx]

## Sheet: Sheet1
Table S6 Predicted physicochemical properties of pectinase proteins
Protein	Number of Amino Acid	Molecular Weight	Theoretical pI	Instability Index	Aliphatic Index	GRAVY	Subcellularlocalization
SlPL2	616	68766.2	7.38	36.22	78.38	-0.394	Extracell
SlPL4	446	49794.4	6.92	29.52	76.28	-0.329	Extracell
SlPL6	449	50822	8.68	33.6	72.54	-0.446	Extracell
SlPL7	398	44563.8	8.52	30.43	84.32	-0.264	Nucleus
SlPL11	456	51078	8.52	34.44	76.16	-0.416	Extracell
SlPL12	401	44277.1	7.61	35.12	77.58	-0.314	Extracell
SolycPME4	585	64293.8	7.93	32.12	80.26	-0.272	Vacuole
SolycPME5	548	59824.9	8.43	26.09	78.38	-0.317	Extracell
SolycPME9	552	60365.9	6.56	31.16	79.33	-0.2	Endoplasmic reticulum
SolycPME12	102	11505	8.68	38.56	59.41	-0.601	Mitochondrion
SolycPME18	456	50936.1	6.8	30.61	85.96	-0.279	Extracell
SolycPME30	498	54968.3	8.48	35.35	75.22	-0.236	Extracell
SolycPME39	368	40775.5	6.03	25.12	78.7	-0.177	Extracell
SolycPME40	342	37574.6	7.58	27.62	71.29	-0.382	Cytoplasm
SolycPME42	627	68377.4	8.74	25.17	89.49	-0.107	Vacuole
SolycPME47	564	62513.5	8.84	26.7	87.5	-0.156	Extracell
SolycPME48	652	69716.4	5.22	40.25	76.98	-0.273	Cytoplasm
SolycPME78	342	38100.2	9.32	23.77	81.2	-0.122	Extracell
SolycPME79	559	60725.4	7.43	37.25	84.31	-0.183	Extracell
SlPG8	449	49213.7	5.9	40.55	81.56	-0.15	Vacuole
SlPG15	392	42373.2	7.84	21.95	85.99	-0.294	Nucleus
SlPG17-2	437	48581.8	9.19	35.66	83.59	-0.054	Nucleus
SlPG24-1	387	41308.6	8.5	29.91	82.09	-0.066	Nucleus
SlPG24-4	387	41367.4	6.44	38.06	79.1	-0.104	Nucleus
SlPG24-6	397	42145.3	6.05	37.05	81.76	-0.094	Nucleus
SlPG24-8	392	41854.3	8.87	37.25	81.56	-0.201	Nucleus
SlPG24-9	392	41867.2	8.49	35.73	83.32	-0.178	Nucleus
SlPG36	392	41903.5	6.29	28.9	83.34	-0.044	Nucleus
SlPG38-1	403	42466.2	6.96	28.05	78.14	-0.157	Nucleus
SlPG38-2	405	43299.4	7	24.76	82.49	-0.146	Nucleus
SlPG44	405	43510.8	7.92	25.66	91.65	0.006	Nucleus
SlPG45	410	43421.3	6.78	35.63	85.56	-0.134	Extracell
SlPG56-2	246	27096.2	7.04	32.09	95.89	-0.023	Cytoplasm
SlPG56-3	467	50954.3	6	39.07	88.99	-0.042	Cytoplasm
