# Supplementary figures and images for: Transcriptomic and the Pectinase Gene Family analysis reveals a particular pathway on malformed tomato development
Source: Research Square preprint supplement (doi:10.21203/rs.3.rs-6365605/v1), 2025-04-14

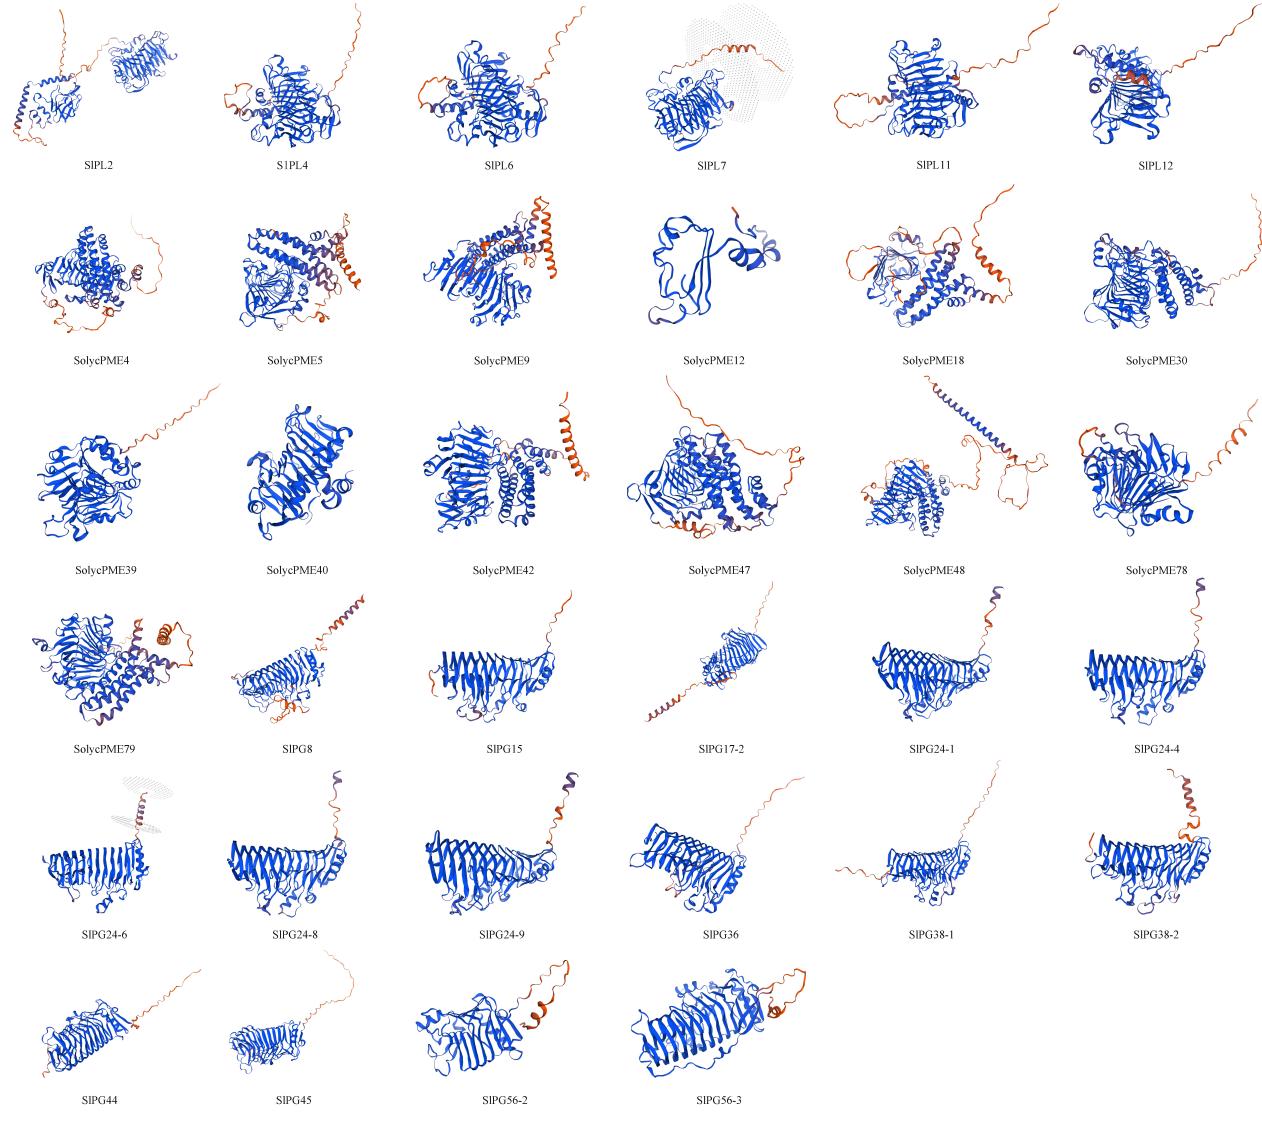

Supplement: Supplementary file 8 [file f4037d2760ec321e65ed86da.docx]
